# Supplementary material
Source: PubMed Central journal article supplement (PMC3078440)

Supplemental Figure 1

A

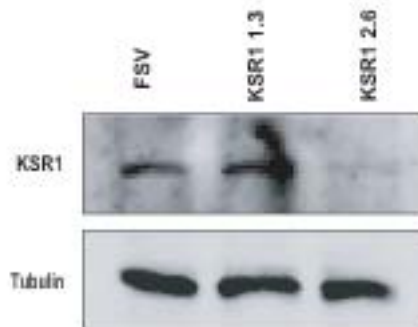

B

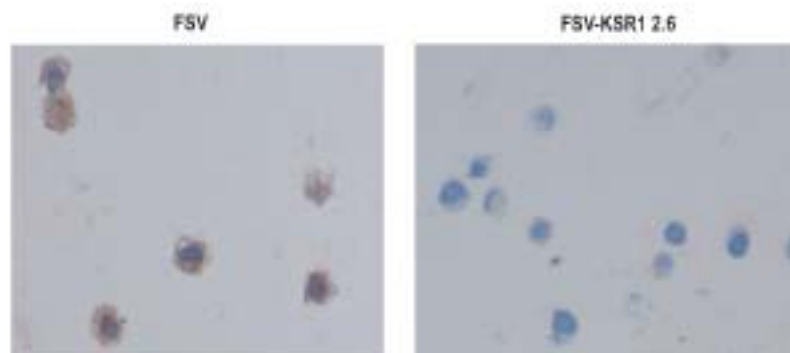

Supplement: mmc1.pdf [file mmc1.pdf]

Supplemental Figure 2

A

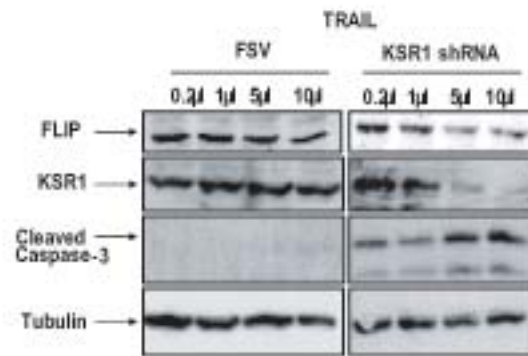

B

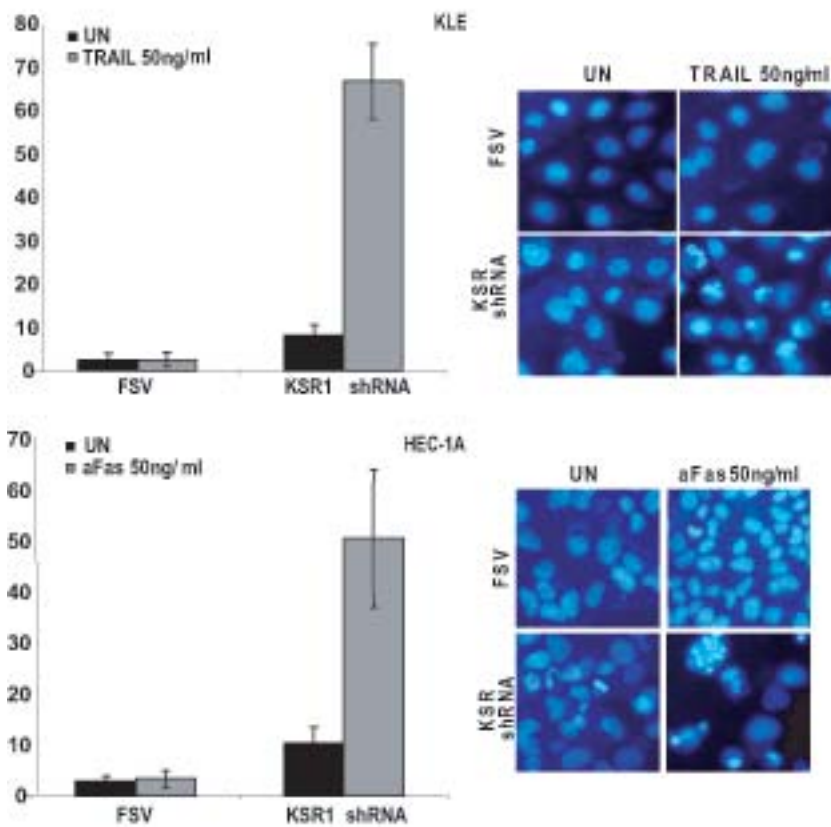

C

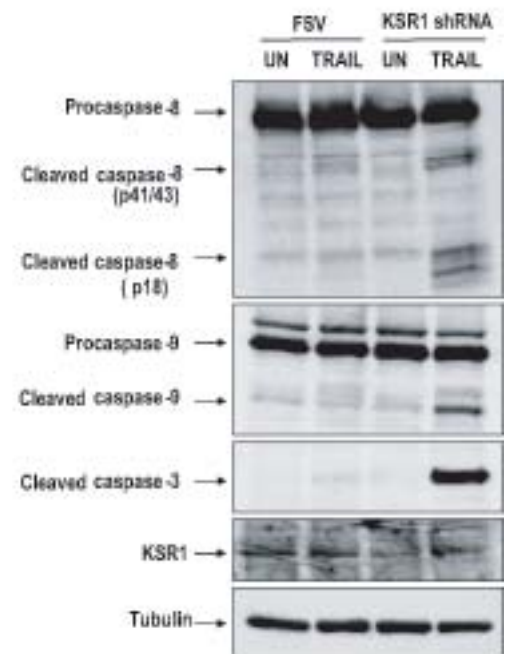

Supplement: mmc2.pdf [file mmc2.pdf]

Supplemental Figure 3

KLE

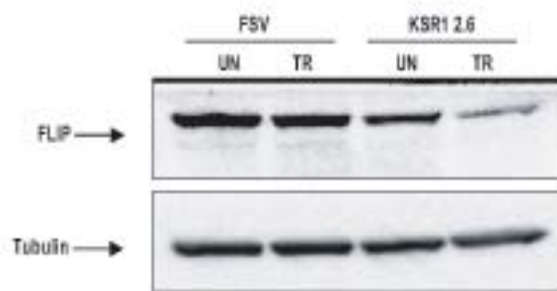

HEC -1A

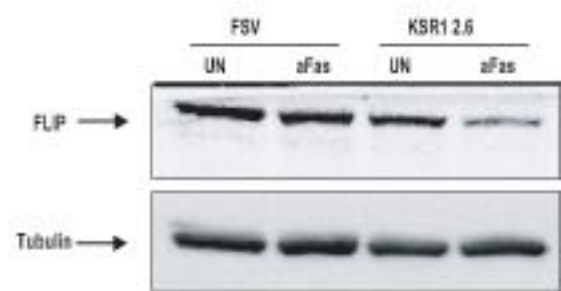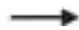

Supplement: mmc3.pdf [file mmc3.pdf]
